# Supplementary material
Source: PubMed Central journal article supplement (PMC4036569)
Supplement: supp_tpc.114.122879_tpc122879Supplemental.pdf [file supp_tpc.114.122879_tpc122879Supplemental.pdf]

Supplemental Data. Indriolo et al. (2014). Plant Cell 10.1105/tpc.114.122879

```

AlARC1  MVTE-AIFASLRRRSSPSLDAYLFTTVDLSDVPLLQTLASTSAELVSCFRGVRFSFQRRN 59
BnARC1  MATDSAMFASSRRRQSPSLEAFLSF-VDLSDVPLLQTLSSISSEIVSCFSNARFSFQRRN 59

AlARC1  SRSLIRKIEVLLFLFEYISD DSGFDS TAVLCFKELYLFLHRSKFLLHYCAQSSKLWLLLQ 119
BnARC1  TRSLIRKIQVFAVLLQHLAPESSLDPTAVLCFKELYLLHHSKFLLRYCAHSSKLWLLLQ 119

AlARC1  NPSLSDFFHVLNRDLVTLLDV-LPINSLNLSDDIREQIELLHQQSSKSTTLFVDHNDLELL 178
BnARC1  SPSSLSDFFHDLKDYSTLLDVFLPVDSLCLNDDVREQVQLLHMQHYVD-----DNDLETL 174

AlARC1  RDRFYSFLDGFEEKGQIPNSEELRSFFVEKLEISDPKSCRDEIEFLLEEQIVNHDCLDLEPT 238
BnARC1  RNRLYSFLDGFENGSVPNSEELRFFFEKLAIKDPTSYREEIEFLLEEQIKSHGCD-LDPT 233

AlARC1  RSLVNGFVAITRYCMFLLEFEDDELEWSIENLKKQRKCLIAEEIVDTEFMT-LPKDFVCS 297
BnARC1  RSVINGFIDITRYVMFLFKIEDG-----NEIKKQRKRLISEEIENTETTLPKDFICS 287

AlARC1  ISLSLMKDPVIVSTGQTYDRSSIVRWF-EEGHSTCPKTGQKLVDS SCIVANLALRNLITR 356
BnARC1  ISLNLMDPVIISTGQTYDRISIARWIHQEGRSTCPKTGQKLVDS-FVSNLALRHLITL 346

AlARC1  WCEAMEFE-DSPNESPASVLOTRASMEATKATVLLILIQNLAGVSELAQIVAAEIRLLAK 415
BnARC1  WCEVTGLSDSPKESLPKVFQTRASTEANKATLSILVQNLAHGSELA----AGEIRVLTR 402

AlARC1  TVRIRGVLIIEAGAIPLCRLLKSKNAVAQEHVSTAMHNLSVCEENRSLIMEENDCLESI 475
BnARC1  TVTEIRLIVETGAIPYLRSLKSNVAQENAVASIFNLSIDEANRSLIVEEHDCLEPI 462

AlARC1  VSVLISGLTLEAQNAAATLYSLSTVHEYKRIANVDGCIKSLASISRNCKPRGKKDALN 535
BnARC1  MSVLIISGLTMRKETAAATLYTLSSVHDYKAIANADGCIKALALVLRNGTVRGKKDAVY 522

AlARC1  ALYGIWSPHDNCSQMINSGGVSAIVRALADEEEAVTERAAVVLGVVANHSLGAEIIGREE 595
BnARC1  ALHSIWLHPDNCSLMVKRGGVSAIVGALG--EEAVAEKVAVVLGVMATESLGAEIIGREE 580

AlARC1  SAVVAGLIELMRCGTPRGKENAVATLLHLCINGGTVVVEKVVVPALSDLTOKLLLTGTNR 655
BnARC1  TVVIGLMELMRCGRPRGKEKAIATLLQLCTAGGAVVTEKVVKTPALAVLTRKLLLTGTDR 640

AlARC1  AKRKASSFLALVCKGCENTAMMWSGNREGSFRTHVSLPISIPVSVL 701
BnARC1  AKRKAVS-LSKVCKGCQNTQR----- 661

```

**Supplemental Figure 1.** Alignment of *A. lyrata* ARC1 and *B. napus* ARC1 amino acid sequences. The alignment was performed with Clustal W2 with a slow pairwise alignment. The protein weight matrix was PAM, the gap open was set to 10 and the gap extension to 0.1.

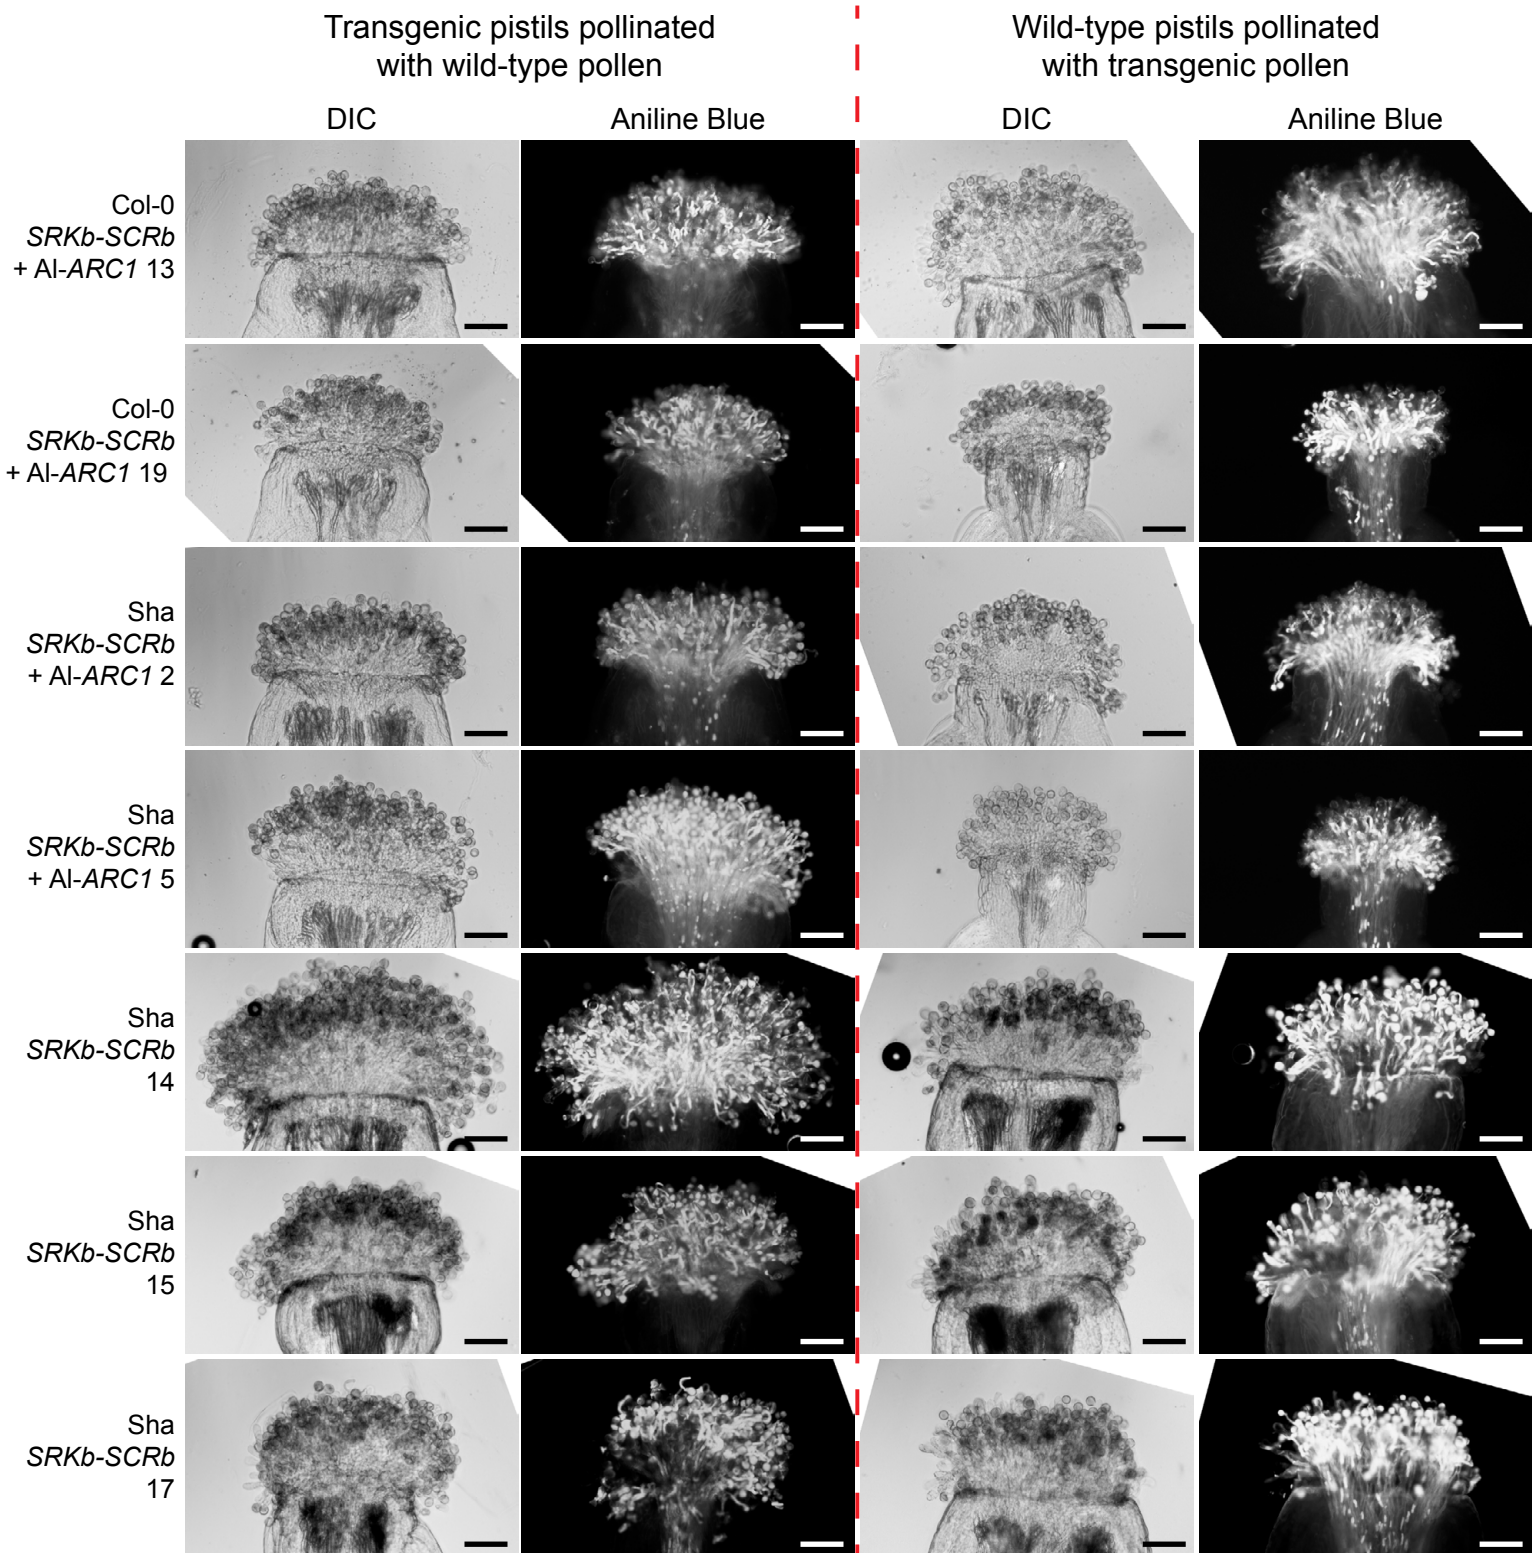

**Supplemental Figure 2.** Pollen grain attachment and pollen tube growth in reciprocal crosses between the transgenic *A. thaliana* Col-0 and Sha lines with wildtype Col-0 and Sha plants, respectively. Functional compatible pollen responses in the transgenic Col-0 and Sha lines were confirmed by reciprocal pollinations with wildtype plants. Following pollinations, pistils were stained with aniline blue to visualize the pollen tubes. All transgenic lines showed fully compatible responses with abundant pollen grain adhesion (DIC images) and pollen tube growth (aniline blue images) in these reciprocal crosses. Scale bars = 50  $\mu$ m.

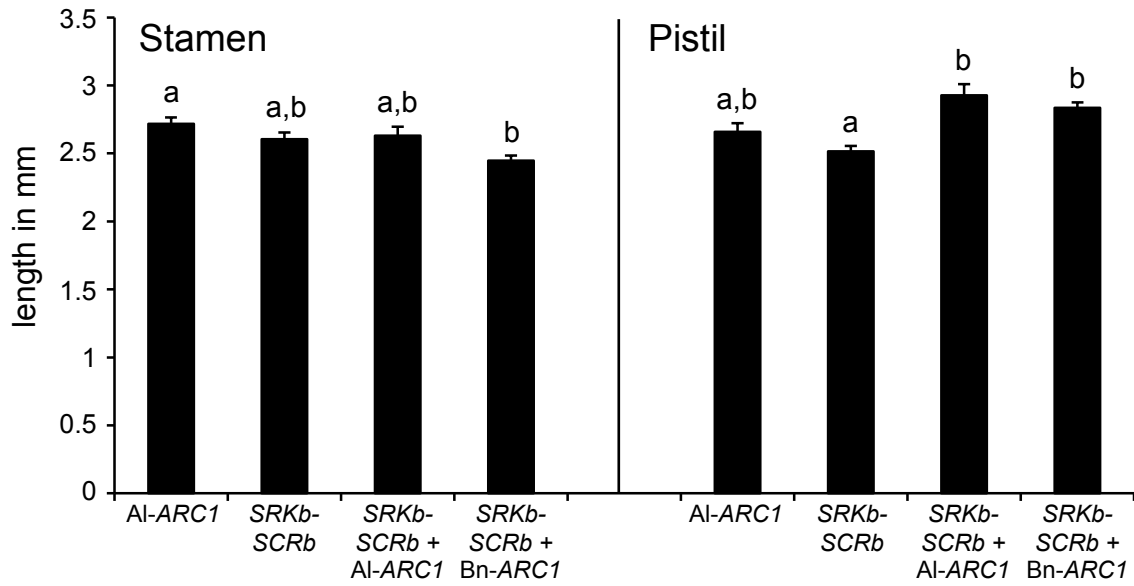

**Supplemental Figure 3.** The approach herkogamy phenotype arises from increased pistil length in the *A. thaliana* *SCRb-SRKb + ARC1* transgenic flowers.

The mean length of stamens and pistils was determined for each transgene combination. When *SCRb-SRKb + ARC1* are expressed, the stamens lengths are not significantly different from the stamen lengths in the *SCRb-SRKb* transgenic flowers. In contrast, the pistils are significantly longer in the *SCRb-SRKb + ARC1* transgenic flowers when compared to pistil lengths in the *SCRb-SRKb* transgenic flowers.

Error bars indicate SE. The different letters represent means that are significantly different at  $P < 0.01$  (one-way ANOVA with Tukey-HSD post-hoc tests).

*Al-ARC1* n=18 flowers (lines 11 & 16); *SCRb-SRKb* n=27 flowers (lines 10, 9, 14); *SCRb-SRKb+Al-ARC1* n=18 flowers (lines 18, 1); *SCRb-SRKb+Bn-ARC1* n=15 flowers (lines 14, 10).

*A. thaliana* Col-0 *SCRb-SRKB* + *Bn-ARC1* 8 (strong SI)

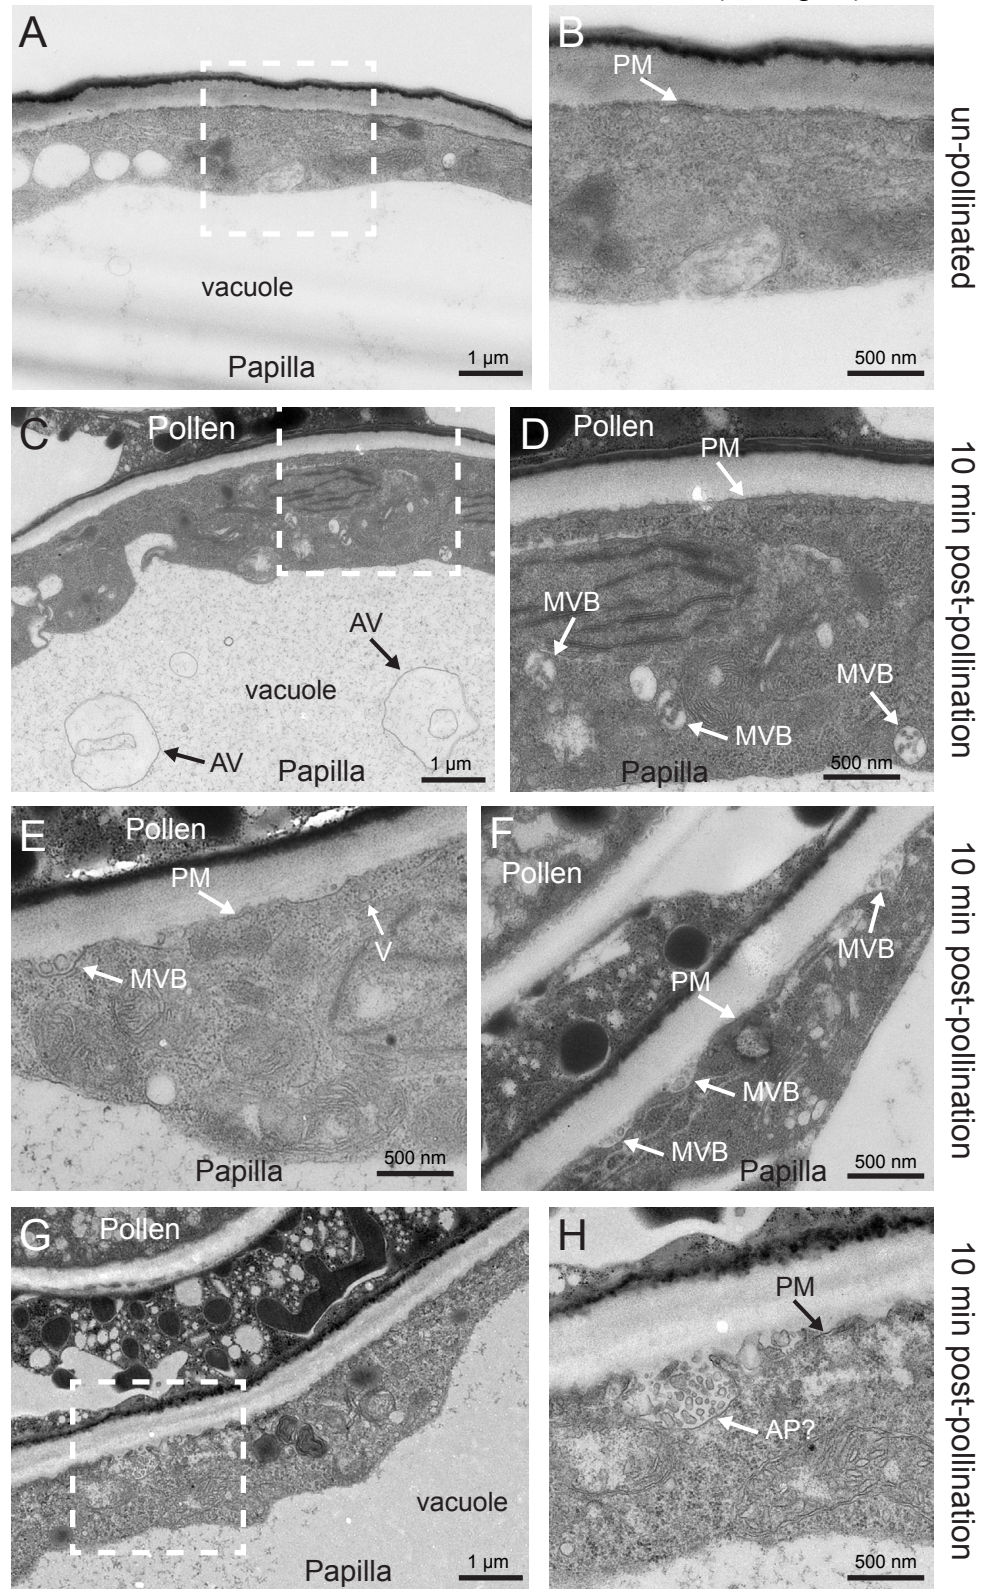

**Supplemental Figure 4.** TEM images of *A. thaliana* Col-0 *SCRb-SRKB* + *Bn-ARC1* line #8 stigmatic papillae in response to self-pollen. **(A)** and **(B)** Unpollinated stigmatic papilla. **(C)** to **(H)** Stigmatic papillae at 10 min post-pollination. Several different events were observed such as autophagic vacuoles (AV) in the vacuole as shown in **(C)**, multivesicular bodies (MVB) in the cytoplasm as shown in **(D)**, vesicles (V) in the cytoplasm as shown in **(E)**, MVBs fusing to the plasma membrane as shown in **(E, F)**, and an autophagosome-like structure (AP?) fusing to the plasma membrane (PM) as shown in **(G, H)**. The white boxed areas in **(A, C, G)** are shown in the **(B, D, H)**, respectively. Scale bars **(A, C, G)** 1 μm; **(B, D, E, F, H)** 500 nm.

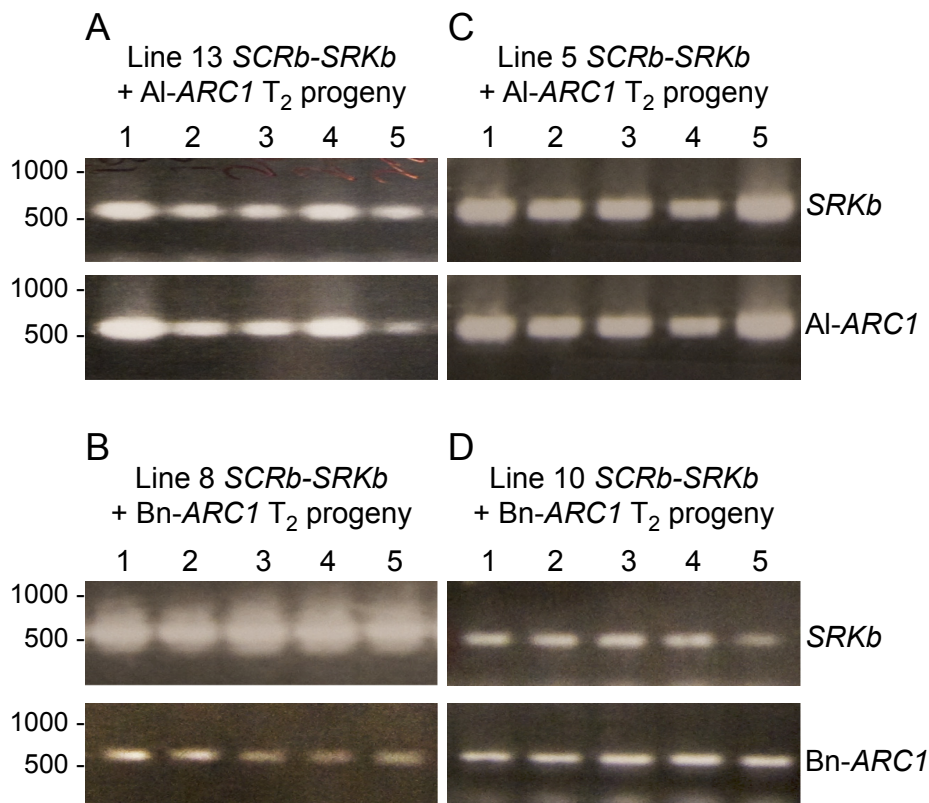

**Supplemental Figure 5.** Genotypes of self-incompatible transgenic T<sub>2</sub> progeny.

**(A, B)** *A. thaliana* Col-0 transgenic T<sub>2</sub> plants.

**(C, D)** *A. thaliana* Sha transgenic T<sub>2</sub> plants.

Self-incompatible transgenic T<sub>2</sub> plants were confirmed to carry both the *SCRb-SRKb* and *ARC1* constructs by PCR genotyping. Data are shown for five different self-incompatible transgenic T<sub>2</sub> plants for each line. The product size for each primer pair is as follows: *SRKb*, 567 bp; *AI-ARC1*, 507 bp; and *Bn-ARC1*, 567 bp. As the *SCRb* and *SRKb* are in the same construct, *SRKb* was used for genotyping for the presence of both transgenes. Primers specific to each transgene were used and are listed in Supplemental Table 2.

**Supplemental Table 1.** Cellular responses in transgenic *A. thaliana* plants at 10 min post-pollination.

| Transgenic Line                                                                                | Vesicles at PM | Compressed cytoplasm | EXPO-like at PM | # of samples*             |                       | Autophagosome /MVBs in cytoplasm | Debris in vacuole | Autophagic organelles in vacuole | Vesicles in vacuole |
|------------------------------------------------------------------------------------------------|----------------|----------------------|-----------------|---------------------------|-----------------------|----------------------------------|-------------------|----------------------------------|---------------------|
|                                                                                                |                |                      |                 | Autophagosome /MVBs at PM | Vesicles in cytoplasm |                                  |                   |                                  |                     |
| <i>A. thaliana</i> Col-0<br><i>SCRb-SRKb</i> +<br><i>Bn-ARC1-8</i><br>strong self-incompatible | 0              | 0                    | 0               | 5                         | 9                     | 4                                | 9                 | 2                                | 6                   |

\*n=10 (where 2 stigmatic papillae per stigma for 5 stigmas were examined).

**Supplemental Table 2.** Primers used for PCR cloning and analyses.

| Primer                                     | Sequence                             |
|--------------------------------------------|--------------------------------------|
| Al-ARC1 cloning 5' 1.12 kb forward         | 5' -ATGGTCACCGAGGC-3'                |
| Al-ARC1 cloning 5' 1.12 kb reverse         | 5' -GAAGCAGGAGACTCGTTTGG-3'          |
| Al-ARC1 cloning 3' 1.38 kb forward         | 5' -TTAACGGGTTTCGTGGCTATC-3'         |
| Al-ARC1 cloning 3' 1.38 kb reverse         | 5' -CACAAAACAGATACAGGTATAG-3'        |
| Al-ARC1 cloning full length forward        | 5' -CCCGGGATGGTCACCGAGGC-3'          |
| Al-ARC1 cloning full length reverse        | 5' -GAATTCTCACAAAACAGATACAGGTATAG-3' |
| Bn-ARC1 cloning full length forward        | 5' -CCCGGGATGGCCACTGATTCAGCA-3'      |
| Bn-ARC1 cloning full length reverse        | 5' -CCCGGGTTATCTCTGTGTGTTCTG-3'      |
| <i>Elf1<math>\alpha</math></i> qRT-forward | 5' -TTCCTCCGTTATCACCAGCG-3'          |
| <i>Elf1<math>\alpha</math></i> qRT-reverse | 5' -GGTCTGCCTCATGTCCCTAA-3'          |
| <i>TUB4</i> qRT-forward                    | 5' -AACGCTGACGAGTGATGGTT-3'          |
| <i>TUB4</i> qRT-reverse                    | 5' -CCAAAGGTAGGATTAGCGAGC-3'         |
| Al-ARC1 qRT-forward                        | 5' -GTGGTGGAGAAGGTGGTGAG-3'          |
| Al-ARC1 qRT- reverse                       | 5' -GCTTAGCCCGATTTGTACCC-3'          |
| Bn-ARC1 qRT-forward                        | 5' -AAAGCCCCTCTCTTTCAAGC-3'          |
| Bn-ARC1 qRT-reverse                        | 5' -TCAACGTAGTGCTGCATGTG-3'          |
| Al-SRKb qRT-forward                        | 5' -GCGTTTGGAGAAGGAAACAG-3'          |
| Al-SRKb qRT-reverse                        | 5' -TTTCCAGGCGATTCATTAGC-3'          |
| Al-SCRb qRT-forward                        | 5' -GGAGAGGAGACGTGCAAAAA-3'          |
| Al-SCRb qRT-reverse                        | 5' -TCGCATAAACGTGCAAAATC-3'          |
| Al-SRK1 qRT-forward                        | 5' -GGTACAGGTTGTGTGATTTGG-3'         |
| Al-SRK1 qRT-reverse                        | 5' -TTCCTCCGTTATCACCAGCG-3'          |
| Al-ARC1 genotyping forward                 | 5' -CAAATGTAGATGGCTGCATCA-3'         |
| Al-ARC1 genotyping reverse                 | 5' -ACATCATCGCTGTGTTTTTCG-3'         |
| Bn-ARC1 genotyping forward                 | 5' -TTCGAGAACGGGAGTGTACC-3'          |
| Bn-ARC1 genotyping reverse                 | 5' -TTCCGTCGAAGCTCTTGTTT-3'          |
| Al-SRKb genotyping forward                 | 5' -GTGGTGGCAGAGCTTCTTTC-3'          |
| Al-SRKb genotyping reverse                 | 5' -ACAAATCGGTGACGTGTTCA-3'          |
